# Supplementary material for: T1-refBlochi: high resolution 3D post-contrast T1 myocardial mapping based on a single 3D late gadolinium enhancement volume, Bloch equations, and a reference T1
Source: Springer Nature journal article supplement (doi:10.1186/s12968-017-0375-1), 2016-12-01

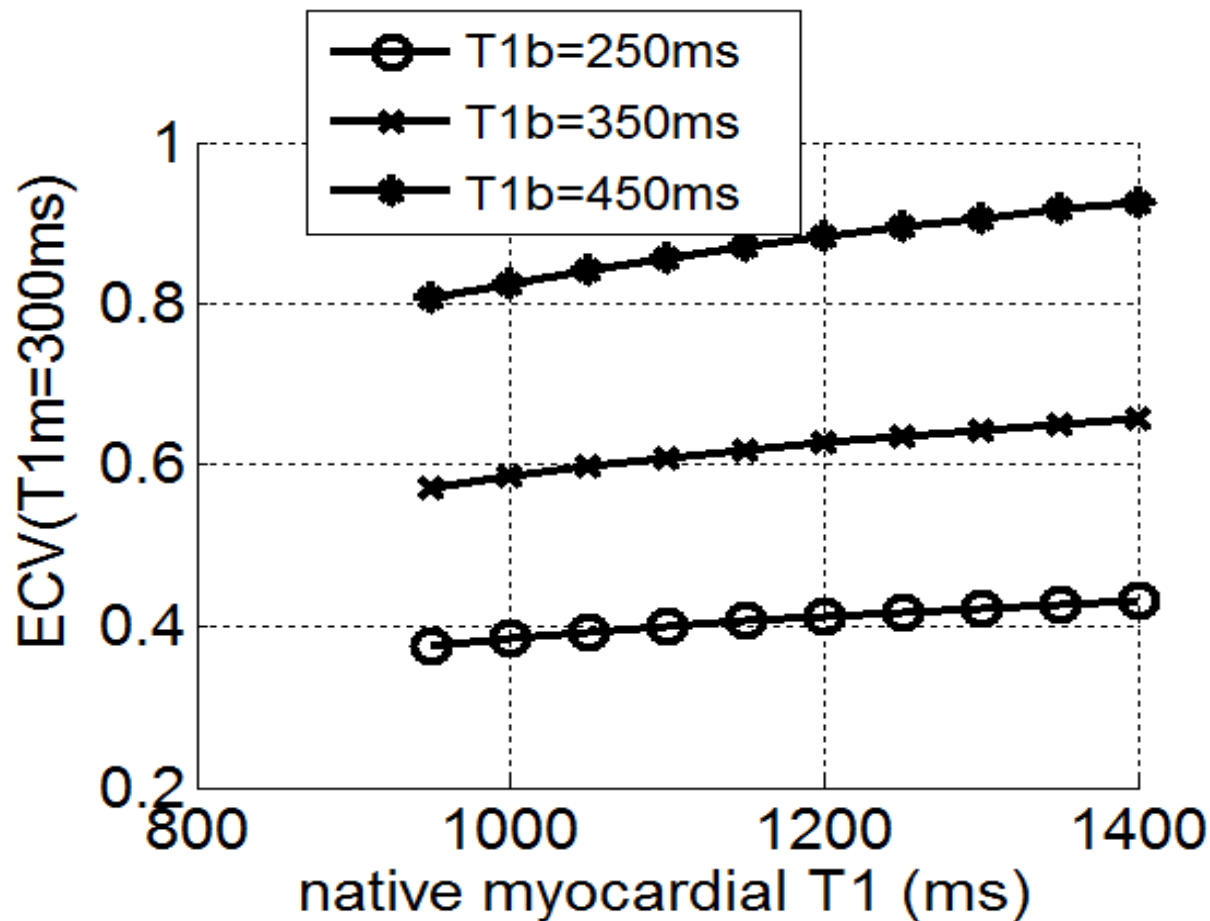

Supplement: MOESM1 [file 14225170]
